# Supplementary material for: A chemiluminescence imaging array for the detection of cancer cells by dual-aptamer recognition and bio-bar-code nanoprobe-based rolling circle amplification
Source: Royal Society of Chemistry journal article supplement (doi:10.1039/c3cc39296a), 2013-01-01
Supplement: c3cc39296a.pdf [file c3cc39296a.pdf]

**Electronic Supplementary Information**

**Chemiluminescence Imaging Array for the Detection of Cancer  
Cells by Dual-Aptamer Recognition and Bio-Bar-Code  
Nanoprobe-Based Rolling Circle Amplification**

Sai Bi, Bin Ji, Zhipeng Zhang and Shusheng Zhang\*

*Key Laboratory of Biochemical Analysis, Ministry of Education, College of Chemistry and  
Molecular Engineering, Qingdao University of Science and Technology, Qingdao 266042,  
P.R.China. Fax: 86 532 84022750; Tel: 86 532 84022750; E-mail: [shushzhang@126.com](mailto:shushzhang@126.com)*

1     **EXPERIMENTAL SECTION**

2     **Materials and Apparatus**

3     The circular DNA template and the other oligonucleotides were synthesized by Takara  
4     Biotechnology Co., Ltd. (Dalian, China) and Sangon Biotechnology Co., Ltd. (Shanghai, China),  
5     respectively. Their sequences are listed in Table S1. Klenow DNA polymerase was obtained from  
6     Fermentas (Canada). The mixture of deoxyribonucleoside 5'-triphosphates (dNTPs) solution was  
7     ordered from SBS Genetech Co., Ltd. (Beijing, China). Luminol standard powder (Aladdin  
8     Chemistry Co., Ltd , Shanghai, China) was prepared as 10 mM in 0.1 M NaOH and further stored  
9     in dark. *p*-iodophenol (PIP) was purchased from Aladdin Chemistry Co., Ltd. ( Shanghai, China ) ,  
10    which needed to be purified by recrystallization before use. Double-distilled, deionized water was  
11    used throughout the experiments. All the reagents provided were of analytical grade and used  
12    without further purification.

13    **Table S1. DNA Sequence Used in This Work**

| Oligonucleotides name     | Sequences (5' to 3') <sup>a</sup>                   |
|---------------------------|-----------------------------------------------------|
| biotinylated aptamer TE02 | biotin- TAGGCAGTGGTTTGACGTCCGCATGTTGGGAATAGCCACGCCT |
| thiolated aptamer TD05    | SH-AACACCGGGAGGATAGTTCGGTGGCTGTTCAGGGTCTCCTCCCGGTG  |
| primer                    | SH-GCATTATTGAGCACTAGCCTCCAG                         |
| detection probe           | biotin-CCCAACCCGCCCTACCC                            |
| circular DNA template     | GTGCTCAATAAAAACCCAACCCGCCCTACCCAAACTGGAGGCTA        |

14    <sup>a</sup> Font colors correspond to the line colors in the schemes.

15  
16    The chemiluminescence imaging was performed on a BioSpectrum 400 chemiluminescence  
17    imager (UVP, USA). The setup is shown in Scheme S1. UV-vis spectra were recorded on a Cary  
18    50 UV-Vis-NIR spectrophotometer (Varian, USA). Atomic Force Microscope (AFM) image was  
19    taken with a Being Nano-Instruments CSPM-4000 (Benyuan, China).

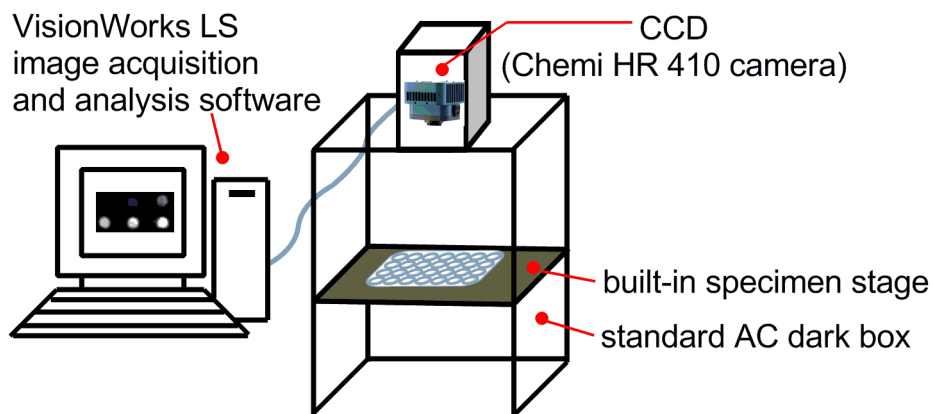

**Scheme S1.** The schematic diagram of the instrumental setup of the BioSpectrum 400 chemiluminescence imager (UVP, USA).

## Cell Culture

Ramos cells (human Burkitt's lymphoma) and MCF-7 (human adenocarcinoma) were cultured according to the American Type Culture Collection (ATCC), respectively. Each cell line was cultured in RPMI medium 1640 supplemented with 10% fetal bovine serum (FBS) and 100 IU/mL penicillin-streptomycin. The cell density was determined using a hemocytometer prior to each experiment. Then, a 1.0 mL suspension of approximate  $1.0 \times 10^6$  cells dispersed in RPMI cell media buffer was centrifuged at 3500 rpm for 5 min and rinsed with phosphate-buffered saline (8.7 mM  $\text{Na}_2\text{HPO}_4 \cdot 12\text{H}_2\text{O}$ , 1.4 mM  $\text{KH}_2\text{PO}_4$ , 2.7 mM KCl, and 136.7 mM NaCl) three times, which was finally redispersed in 1.0 mL of cell media buffer.

## The Preparation of Aptamer TE02-Coated Microarray

Firstly, the coating solution was prepared by diluting streptavidin to the concentration of 2  $\mu\text{g}/\text{ml}$  with 0.05 M  $\text{Na}_2\text{CO}_3$ - $\text{NaHCO}_3$  buffer (pH 9.6). For each well of the microtiter plate, a 100  $\mu\text{L}$  of the coating solution was introduced, followed by drying at 37  $^\circ\text{C}$  overnight to obtain the pre-coated microtiter plate. Then, the PBST buffer containing 0.01 M PBS and 0.05% (v/v)

1 Tween-20 was used to washed the microtiter plate for five times to remove the unbound  
2 streptavidin. It is worth to note that this treatment should last for 1 min to ensure the complete  
3 washing. After another drying at 37 °C for 2 h, the as-prepared streptavidin-coated 96-well  
4 microtiter plate was encapsulated and stored at 2~5 °C for further use. The aptamer TE02-coated  
5 microarray was further prepared by adding 10 µL of  $1.0 \times 10^{-7}$  M aptamer TE02 to each well,  
6 followed by incubation for 40 min at room temperature and washing with PBS for three times.

### 7 **Synthesis of AuNPs**

8 AuNPs were prepared by the method of reduction of tetrachloroauric acid (HAuCl<sub>4</sub>) with  
9 trisodium citrate.<sup>S1</sup> Briefly, 100 ml of 0.01% HAuCl<sub>4</sub> solution filtrated through 22 µm porous  
10 membrane was heated to boiling with vigorous stirring and reflux, followed by rapid addition of  
11 3.0 ml of 1% trisodium citrate solution dropwise. The solution maintained stirring and boiling for  
12 30 min with the color gradually from gray yellow to deep red, indicating the formation of AuNPs.  
13 The heating was then stopped. After cooling down the resulting colloidal suspension to room  
14 temperature with stirring for 20 min, the AuNPs with an average diameter of 15 nm were obtained.  
15 The as-prepared AuNPs was characterized by AFM.

### 16 **Fabrication of Bio-Bar-Code AuNP Probe**

17 This step is one of the most essential procedures in the assay. Firstly, 10 µL of  $1.0 \times 10^{-7}$  M  
18 thiolated aptamer TD05 (thiol-TD05) and 10 µL of  $1.0 \times 10^{-6}$  M thiolated primer DNA were  
19 activated by 10 µL of  $1.0 \times 10^{-5}$  M and 10 µL of  $1.0 \times 10^{-4}$  M mild reducing agent  
20 DL-dithiothreitol (DTT), respectively, which were mixed and introduced to the as-prepared AuNP  
21 colloid (the original volume of AuNP solution is 1.3 mL). After incubating at 37 °C for 16 h with  
22 gently shaking in dark, the mixture was subjected to “aging” by the addition of 1.0 M NaCl up to a

1 concentration of 50 mM and reacted at room temperature for 6 h. Additional 1.0 M NaCl was  
2 continued adding to a final concentration of 100 mM and further reacted at room temperature for  
3 another 6 h. After centrifugating at 10000 rpm for 50 min, the precipitation of bio-bar-code AuNPs  
4 was further reacted with 10  $\mu$ L of  $1.0 \times 10^{-6}$  M circular DNA template at 25  $^{\circ}$ C for 1 h. The  
5 resulting nanoprobes were centrifugated at 10000 rpm for 30 min, redispersed in 10  $\mu$ L of 0.02 M  
6 Tris-HCl buffer, and stored at 4  $^{\circ}$ C before use.

### 7 **Cell Assay on CLIA**

8 In a typical experiment for the detection of cancer cells, 10  $\mu$ L of sample solution containing a  
9 desired amount of Ramos cells in 0.01 M PBS buffer and 10  $\mu$ L of the as-prepared bio-bar-code  
10 AuNP probe were added to the sample application aptamer TE02-coated well. After incubation for  
11 30 min to allow the binding of cells on microwell surface via aptamer TE02 recognition and the  
12 recognition of cell membrane protein by aptamer TD05 on AuNP probes. The excess probes were  
13 removed by washing with 200  $\mu$ L of 0.01 M PBS buffer for three times. The RCA reaction was  
14 initiated by adding 6.5  $\mu$ L of 10 mM dNTPs, 2  $\mu$ L of Klenow DNA polymerase buffer, 1.5  $\mu$ L of  
15 10 U/ $\mu$ L Klenow DNA polymerase, followed by reacting at 37  $^{\circ}$ C for 1 h in water bath. A 10  $\mu$ L of  
16  $1.0 \times 10^{-5}$  M biotinylated detection probe DNA and a 5  $\mu$ L of  $2.0 \times 10^{-5}$  M streptavidin-HRP were  
17 then added and incubated at 25  $^{\circ}$ C for 1 h. After washing with PBS for four times, 50  $\mu$ L of 10  
18 mM luminol, 50  $\mu$ L of 300 mM H<sub>2</sub>O<sub>2</sub>, and 50  $\mu$ L of 10 mM PIP were added to each sample well  
19 and incubated for 10 min. The CL images were simultaneously recorded by using a cooled CCD  
20 camera. The spots were automatically quantified by VisionWorks LS image acquisition and  
21 analysis software of chemiluminescence imager BioSpectrum 400 (UVP, USA). The CL intensity  
22 of each spot was calculated as the mean pixel within a circle of a given diameter around each spot

center. In the case of Ramos cells detection in human blood, the desired amount of Ramos cells was spiked into 1:10 diluted blood and applied to the sample application well. Other procedures were the same as those described above.

### Control Experiment

To confirm the role of the fabricated bio-bar-code nanoprobe for Ramos cell detection, control experiment was carried out by using only primers to construct AuNPs which further performed the RCA to obtain HRP-labeled nanoprobe (Fig. S1, pathway a). The results showed that no signal was observed in this case because there was no recognition site between the nanoprobe and target cells (Fig. S1, a). Thus, aptamer TD05 played an important role in not only fabricating bio-bar-code nanoprobe to amplify signal, but also recognizing target cell to improve specificity. In addition, there was no nonspecific absorption of HRP-labeled bio-bar-code AuNP probe on the surface of target cells.

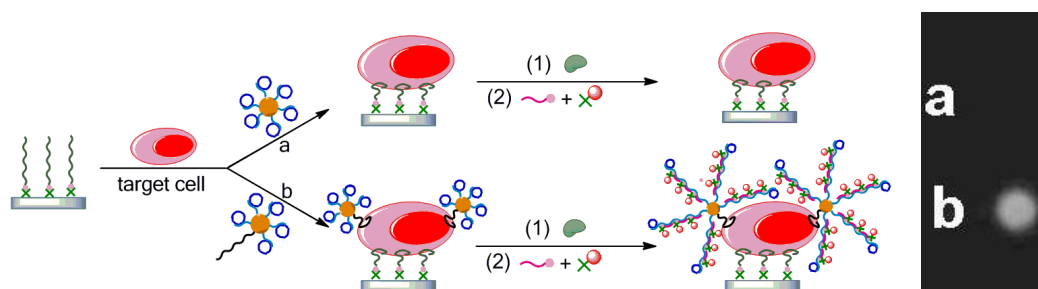

**Fig. S1** Schematic representation and CCD results of the control experiment by using only primers to construct the AuNP probe. The amounts of Ramos cells are 6000 cells for each sample.

# Calculation of the Number of Aptamer TD05 and Primers per ~15 nm-AuNP Surface

The UV-vis absorbance calibration curves of standard DNA solution of aptamer TD05 (from  $1.0 \times 10^{-8}$  M to  $1.0 \times 10^{-7}$  M) and primers (from  $1.0 \times 10^{-7}$  M to  $1.0 \times 10^{-6}$  M) are shown in **Fig. S2**.

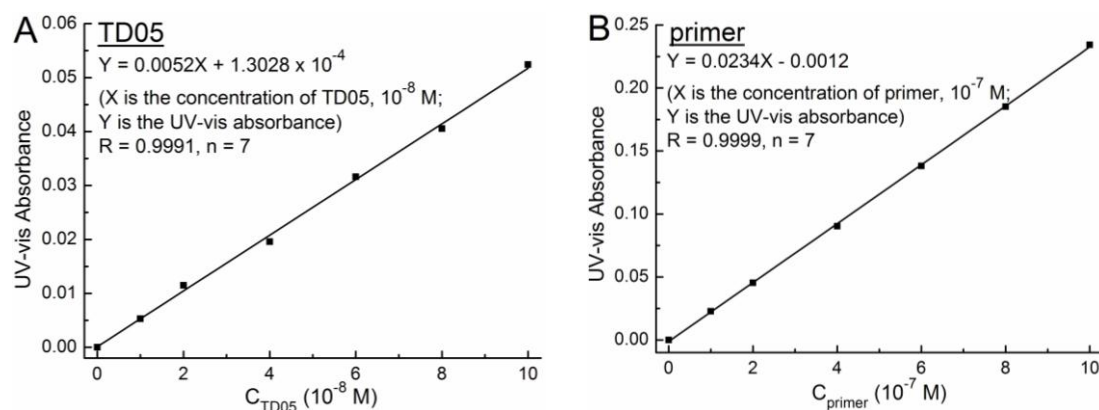

**Fig. S2.** UV-vis absorbance calibration curves of standard DNA solution of (A) aptamer TD05 and (B) primers.

Take the calculation of the surface coverages of TD05 on AuNP as example. 2 mL of  $1.0 \times 10^{-7}$  M activated TD05 was added to AuNP colloids (the original volume of AuNP solution is 10 mL). After incubation as mentioned in “Fabrication of Bio-Bar-Code AuNP Probe”, the number of aptamer TD05 immobilized on AuNPs was quantitatively calculated from the UV-vis absorbance difference at 260 nm before and after its immobilization as follows.

UV-vis absorbance of the supernatant before immobilization: 0.05241

Concentration of TD05 before immobilization:  $1.0 \times 10^{-7}$  M

UV-vis absorbance of the supernatant after immobilization: 0.02569

Concentration of TD05 after immobilization:  $4.94 \times 10^{-8}$  M

Moles of total TD05 immobilized on the as-prepared AuNPs:  $(1.0 \times 10^{-7} - 4.94 \times 10^{-8}) \times 2 \times 10^{-3} =$

$1.01 \times 10^{-10}$  mole

1 Similarly, the number of primers immobilized on AuNPs was quantitatively calculated as  
2 follows.

3 UV-vis absorbance of the supernatant before immobilization: 0.23425

4 Concentration of primers before immobilization:  $1.0 \times 10^{-6}$  M

5 UV-vis absorbance of the supernatant after immobilization: 0.11357

6 Concentration of primers after immobilization:  $4.92 \times 10^{-7}$  M

7 Moles of total primers immobilized on the as-prepared AuNPs:  $(1.0 \times 10^{-6} - 4.92 \times 10^{-7}) \times 2 \times 10^{-3}$   
8  $= 1.02 \times 10^{-9}$  mole

9 The moles of the as-prepared AuNPs were determined by assuming that all nanoparticles were  
10 spherical, all  $\text{HAuCl}_4$  was reacted and the density of nanoparticles was the same as bulk gold.<sup>s2</sup>

11 The concentration of  $\text{Au}^{3+}$  in  $\text{HAuCl}_4 \cdot 4\text{H}_2\text{O}$ :  $(0.01\text{g} / 411.85 \text{ g/mol}) / 100 \text{ ml} = 2.42806 \times 10^{-4}$  M

12 The amount of Au atoms per AuNP:  $(4/3\pi R^3) / (4/3\pi r^3) = (15/0.268)^3 = 175335.31$

13 The concentration of AuNP solution:  $2.42806 \times 10^{-4} \text{ M} / 175335.31 = 1.385 \times 10^{-9}$  M

14 The moles of the as-prepared AuNPs used:  $1.385 \times 10^{-9} \text{ M} \times 10 \text{ ml} = 1.385 \times 10^{-11}$  mole

15 **Table S2. Quantitive Determination of the surface coverages of TD05 and primers on AuNPs**

| AuNPs (mol)             | TD05 (mol)             | primer (mol)          | ratio of AuNPs/TD05/primer |
|-------------------------|------------------------|-----------------------|----------------------------|
| $1.385 \times 10^{-11}$ | $1.01 \times 10^{-10}$ | $1.02 \times 10^{-9}$ | 1/7.3/73.6                 |

16

17

**Table S3.** Comparison between the proposed strategy and other reported methods for cancer cells detection based on aptamer recognition

| Cancer Cells | Detection Method                     | Detection Limit | Ref.         |
|--------------|--------------------------------------|-----------------|--------------|
| Ramos        | aptamer-nanoparticle strip biosensor | 800 cells       | S3           |
| CCRF-CEM     | fluorescence imaging                 | 250 cells       | S4           |
| CCRF-CEM     | colorimetric detection               | 90 cells        | S5           |
| MCF-7        | electrochemical detection            | 100 cells       | S6           |
| Ramos        | electrochemiluminescence detection   | 210 cells/mL    | S7           |
| Ramos        | electrochemiluminescence detection   | 126 cells/mL    | S8           |
| MCF-7        | fluorescence detection               | 500 cells/mL    | S9           |
| CCRF-CEM     | fluorescence detection               | 4000 cells/mL   | S10          |
| MCF-7        | electrochemical detection            | 100 cells/mL    | S11          |
| CCRF-CEM     | quartz crystal microbalance          | 8000 cells/mL   | S12          |
| Ramos        | chemiluminescence imaging            | 163 cells       | <sup>a</sup> |

<sup>a</sup>This method.

3

**Selectivity.**

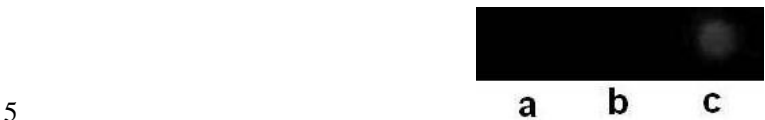

**Fig. S3** Microwell array CCD images of (a) blank, (b) MCF-7 cells, and (c) Ramos cells. The amounts of cells are 1000 cells for each sample.

8

**Detection of Ramos Cells in Human Blood**

**Table S4.** CL Intensity of Blood Samples Spiked with and without Romas Target Cells

| Sample | Blood sample (cells/mL) | Added target cells (cells/mL) | Detected cells (cells/mL) | Recovery (%) |
|--------|-------------------------|-------------------------------|---------------------------|--------------|
| 1      | - [a]                   | 200                           | 183                       | 91.5         |
| 2      | -                       | 2000                          | 1789                      | 89.4         |
| 3      | -                       | 20000                         | 18927                     | 94.6         |

[a] No CL response

12

**References**

S1. S. Bi, Y. Yan, X. Yang, S. Zhang, *Chem. Eur. J.*, 2009, **15**, 4704-4709.

- 1 S2. J. Liu, Y. Lu, *J. Am. Chem. Soc.*, 2004, **126**, 12298-12305.
- 2 S3. G. Liu, X. Mao, J. A. Phillips, H. Xu, W. Tan and L. Zeng, *Anal. Chem.*, 2009, **81**,  
3 10013-10018.
- 4 S4. J. E. Smith, C. D. Medley, Z. Tang, D. Shuangguan, C. Lofton and W. Tan, *Anal. Chem.*, 2007,  
5 **79**, 3075-3082.
- 6 S5. C. D. Medley, J. E. Smith, Z. Tang, Y. Wu, S. Bamrungsap and W. Tan, *Anal. Chem.*, 2008, **80**,  
7 1067-1072.
- 8 S6. X. Zhu, J. Yang, M. Liu, Y. Wu, Z. Shen and G. Li, *Anal. Chim. Acta*, 2013, **764**, 59-63.
- 9 S7. G. Jie, L. Wang, J. Yuan and S. Zhang, *Anal. Chem.*, 2011, **83**, 3873-3880.
- 10 S8. X. Hun, H. C. Chen and W. Wang, *Biosens. Bioelectron.*, 2011, **26**, 3887-3893.
- 11 S9. J. Zhao, L. Zhang, C. Chen, J. Jiang and R. Yu, *Anal. Chim. Acta*, 2012, **745**, 106-111.
- 12 S10. T. Deng, J. Li, L.-L. Zhang, J.-H. Jiang, J.-N. Chen, G.-L. Shen and R.-Q. Yu, *Biosens.*  
13 *Bioelectron.*, 2010, **25**, 1587-1591.
- 14 S11. J. Li, M. Xu, H. Huang, J. Zhou, E. S. Abdel-Halimb, J.-R. Zhang and J.-J. Zhu, *Talanta*,  
15 2011, **85**, 2113-2120.
- 16 S12. Y. Pan, M. Guo, Z. Nie, Y. Huang, C. Pan, K. Zeng, Y. Zhang and S. Yao, *Biosens.*  
17 *Bioelectron.*, 2010, **25**, 1609-1614.
